# Supplementary material for: Characterisation of a dipolar chromophore with third-harmonic generation applications in the near-IR
Source: Royal Society of Chemistry journal article supplement (doi:10.1039/c2jm15599k), 2012-01-01
Supplement: c2jm15599k.pdf [file c2jm15599k.pdf]

Electronic Supporting Information for:

**Characterisation of a Dipolar Chromophore with Third-Harmonic  
Generation Applications in the Near-IR**

Yulia A. Getmanenko,<sup>1</sup> Joel M. Hales,<sup>b</sup> Mihaela Balu,<sup>b</sup> Jie Fu,<sup>b</sup> Egbert Zojer,<sup>ac</sup> Ohyun Kwon,<sup>a</sup> Jeffrey Mendez,<sup>d</sup> S. Thayumanavan,<sup>d</sup> Gregory Walker,<sup>e</sup> Qing Zhang,<sup>a</sup> Scott D. Bunge,<sup>f</sup> Jean-Luc Brédas,<sup>a</sup> David J. Hagan,<sup>b</sup> Eric W. Van Stryland,<sup>b</sup> Stephen Barlow,<sup>ae</sup> Seth R. Marder<sup>ade</sup>

---

<sup>1</sup>School of Chemistry and Biochemistry and Center for Organic Photonics and Electronics, Georgia Institute of Technology, Atlanta, GA 30332-0400, USA

<sup>b</sup>CREOL & FPCE, The College of Optics and Photonics and Department of Physics, University of Central Florida, Orlando, FL 32816-2700

<sup>c</sup>Institute of Solid State Physics, Graz University of Technology, 8010 Graz, Austria

<sup>d</sup>Beckman Institute, California Institute of Technology, Pasadena, CA 91125, USA

<sup>e</sup>Department of Chemistry, University of Arizona, Tucson, AZ 85721, USA

<sup>f</sup>Department of Chemistry, Kent State University, Kent, OH 44242-0001, USA

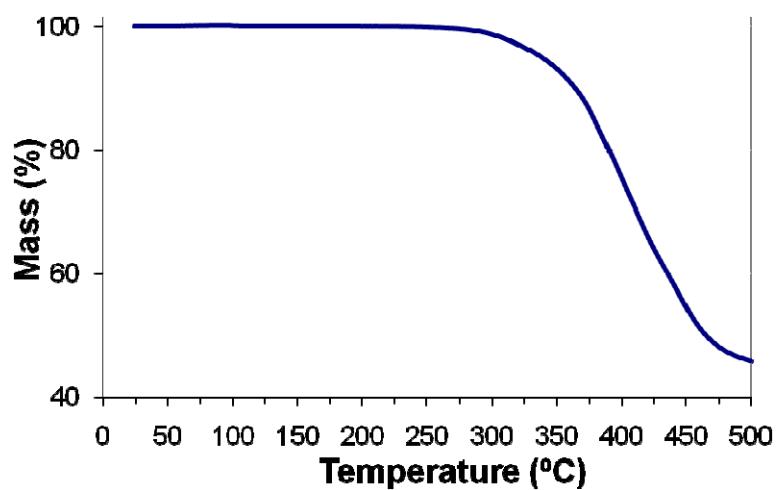

**Figure S1.** TGA scan of chromophore **1** ( $5\text{ }^{\circ}\text{C min}^{-1}$ ).

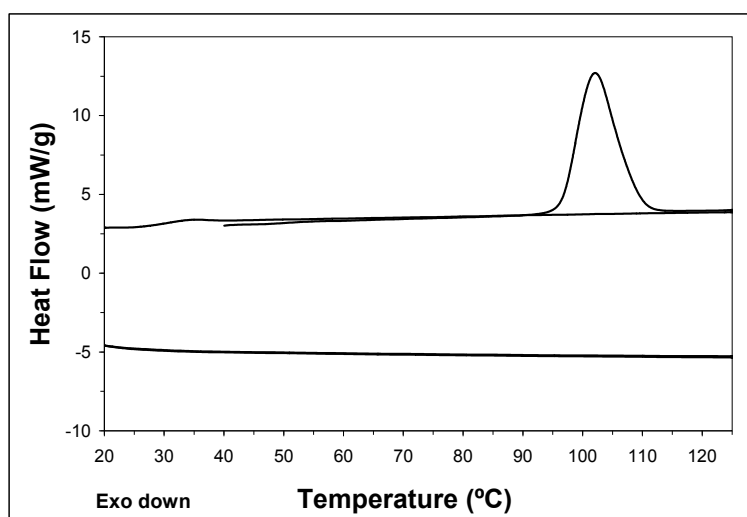

**Figure S2.** DSC thermogram ( $10\text{ }^{\circ}\text{C/min}$  rate for 1<sup>st</sup> heating-cooling cycle;  $5\text{ }^{\circ}\text{C/min}$  rate for 2<sup>nd</sup> heating-cooling cycle) showing a melting point of ca.  $103\text{ }^{\circ}\text{C}$  on the first heating and a glass transition at ca.  $34\text{ }^{\circ}\text{C}$  on the second heating.

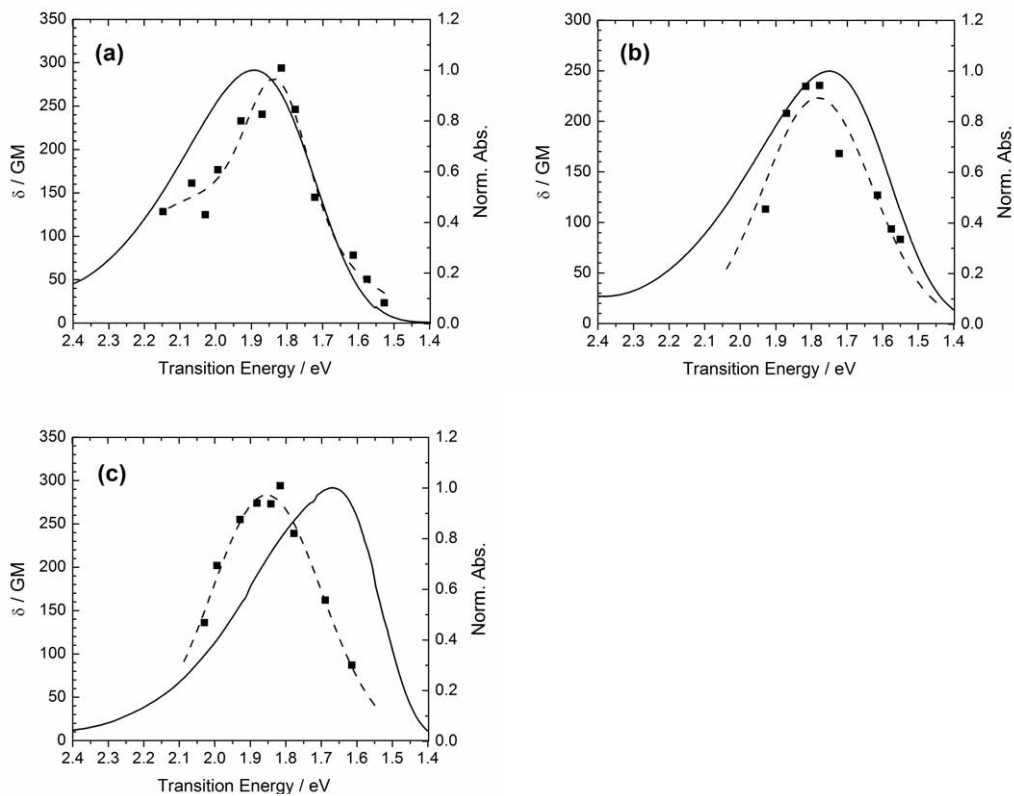

**Figure S3.** 1PA spectra (solid line) and non-degenerate 2PA spectra acquired using the WLC pump-probe method with a pump wavelength of 1800 nm (solid squares linked with broken lines) for all compounds in THF: (a) **1**, (b) **2**, and (c) **3**. Broken lines used for the non-degenerate 2PA data are meant as guides for the eye.  $1 \text{ GM} = 1 \times 10^{-50} \text{ cm}^4 \text{ sec phot}^{-1}$ . Errors associated with experimentally-determined  $\delta$  values are  $\pm 15\%$ .

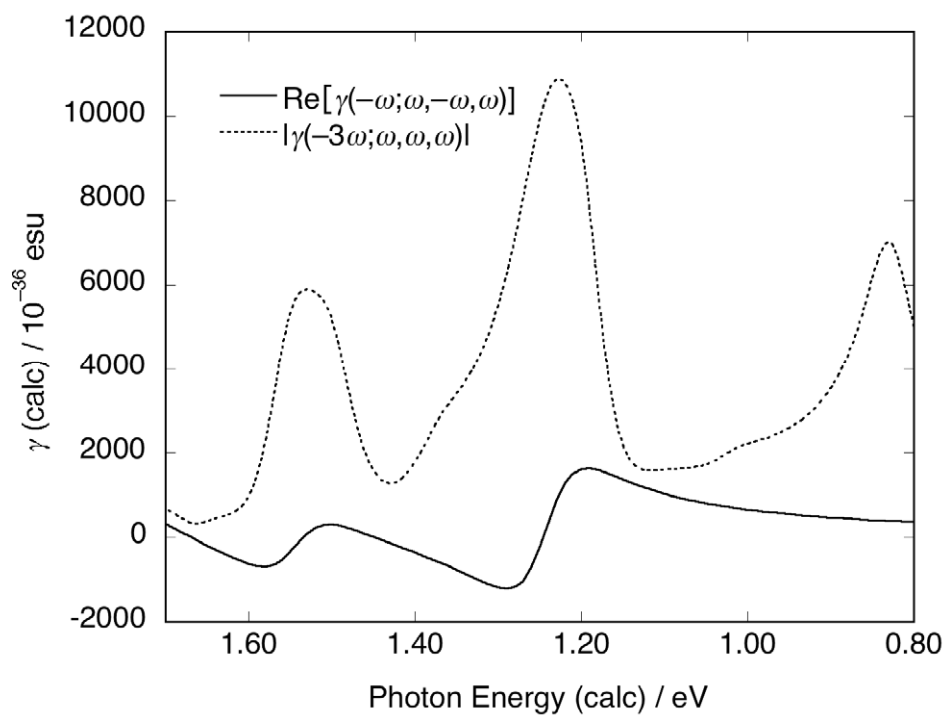

**Figure S4.** Calculated dispersions of  $\text{Re}[\chi(-\omega; \omega, -\omega, \omega)]$  and of the absolute magnitude of  $\chi(-3\omega; \omega, \omega, \omega)$  for **1** over a wider energy range than that shown in Figure 7. Several resonances due to multi-photon enhancements are visible.
